# Supplementary material for: A strongly coupled Au/Fe3O4/GO hybrid material with enhanced nanozyme activity for highly sensitive colorimetric detection, and rapid and efficient removal of Hg2+in aqueous solutions
Source: Royal Society of Chemistry journal article supplement (doi:10.1039/c5nr00527b), 2015-01-01
Supplement: c5nr00527b1.pdf [file c5nr00527b1.pdf]

Supporting Information

# Strongly Coupled Au/Fe<sub>3</sub>O<sub>4</sub>/GO hybrid Material with Enhanced Nanozyme Activity for Highly Sensitively Colorimetric Detection, Rapid and Efficient Removal of Hg<sup>2+</sup> in Aqueous solutions

Shouting Zhang<sup>a</sup>, Hua Li<sup>b</sup>, Zhiyi Wang<sup>a</sup>, Jian Liu<sup>a</sup>, Haoli Zhang<sup>a</sup>, Baodui Wang<sup>a\*</sup>, Zhengyin Yang<sup>a\*</sup>

<sup>a</sup>Key Laboratory of Nonferrous Metal Chemistry and Resources Utilization of Gansu Province, State Key Laboratory of Applied Organic Chemistry, and Key Laboratory of Special Function Materials and Structure Design, Ministry of Education, Lanzhou University Gansu, Lanzhou, 730000 (P.R. China).

E-mail: wangbd@lzu.edu.cn ; yangzy@lzu.edu.cn .

<sup>b</sup>Key Laboratory for Magnetism and Magnetic Materials of the Ministry of Education, Lanzhou University, Lanzhou, 730000, People's Republic of China

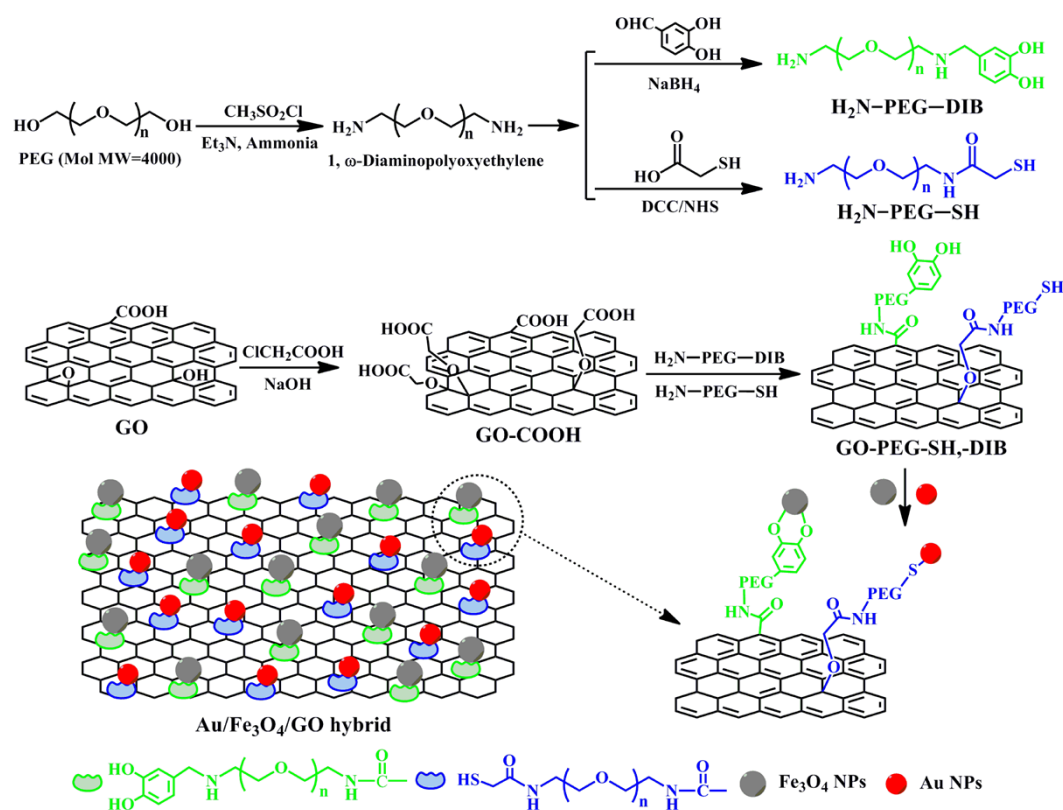

**Scheme S1** The synthetic route of Au/Fe<sub>3</sub>O<sub>4</sub>/GO hybrid.

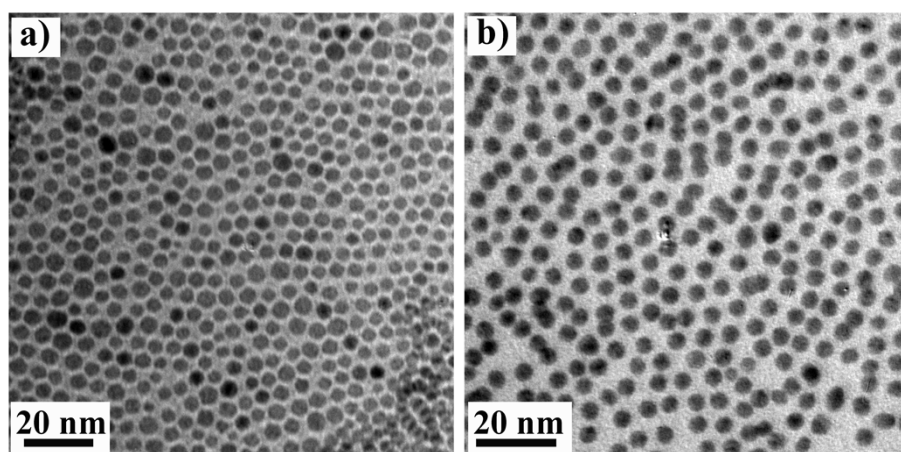

**Figure S1.** TEM images of as-prepared 7 nm Fe<sub>3</sub>O<sub>4</sub> NPs (a) and 5 nm Au NPs (b).

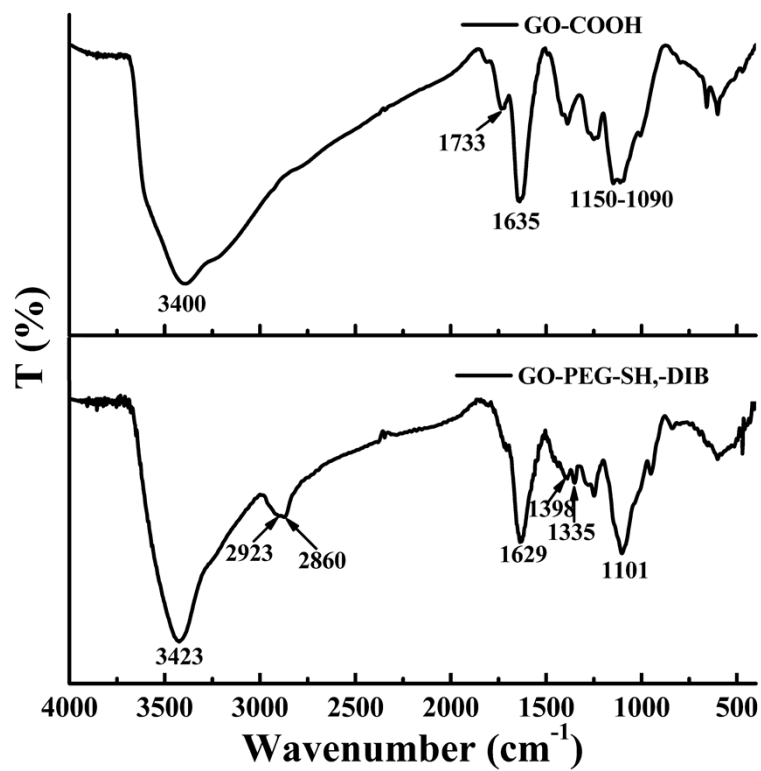

**Figure S2.** Fourier transform infrared (FTIR) spectrum of GO-COOH, GO-PEG-SH,-DIB.

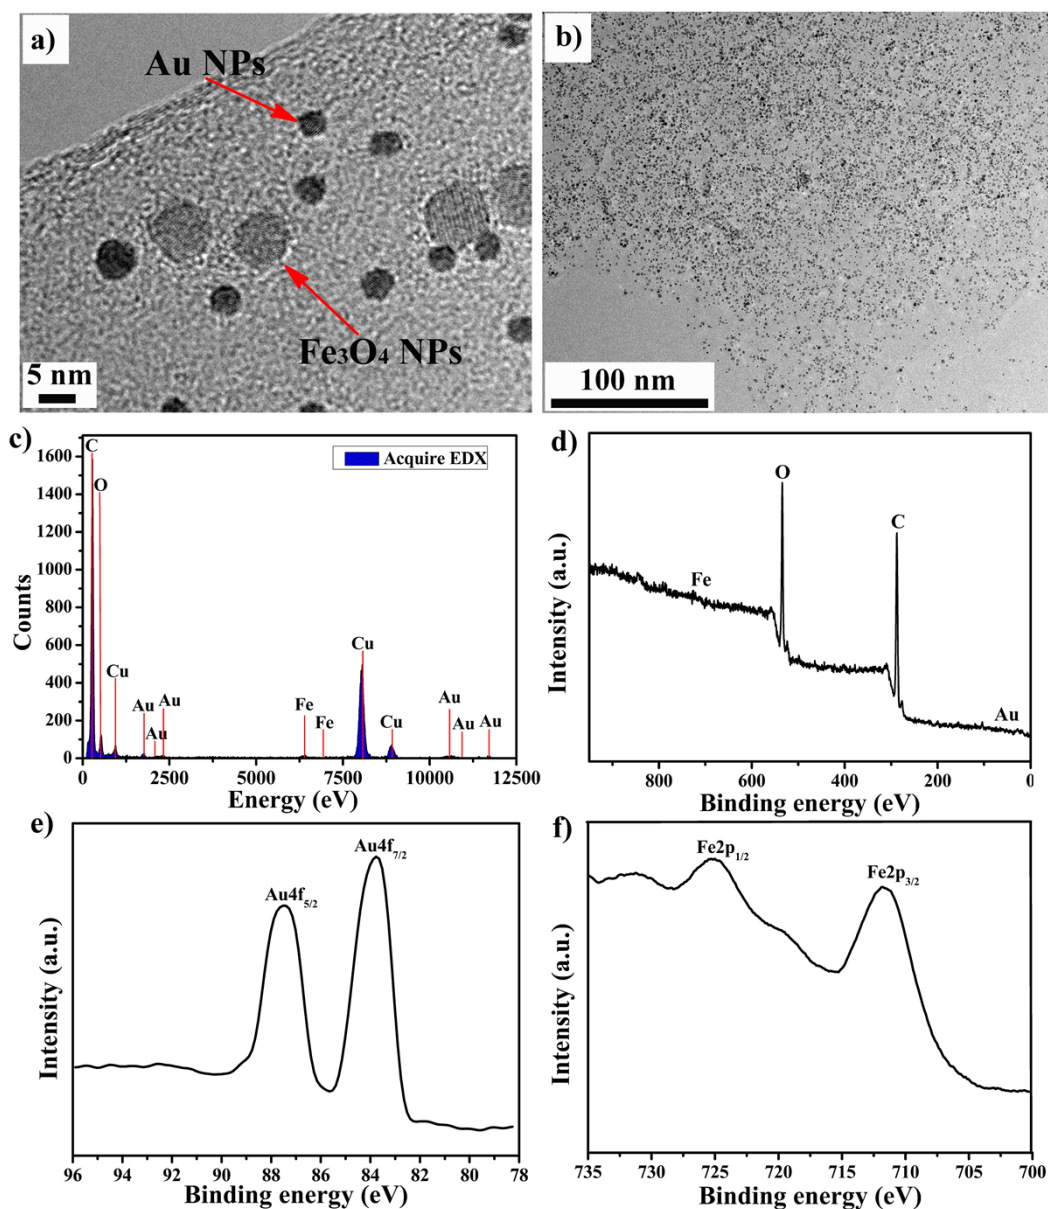

**Figure S3.** (a, b) Different magnification TEM images of Au/Fe<sub>3</sub>O<sub>4</sub>/GO hybrid. (c) EDX spectra of the as-synthesized Au/Fe<sub>3</sub>O<sub>4</sub>/GO hybrid. (d, e, f) XPS spectra of the as-synthesized Au/Fe<sub>3</sub>O<sub>4</sub>/GO hybrid. (e) The spectrum in the Au 4f region. (f) The spectrum in the Fe 2p region.

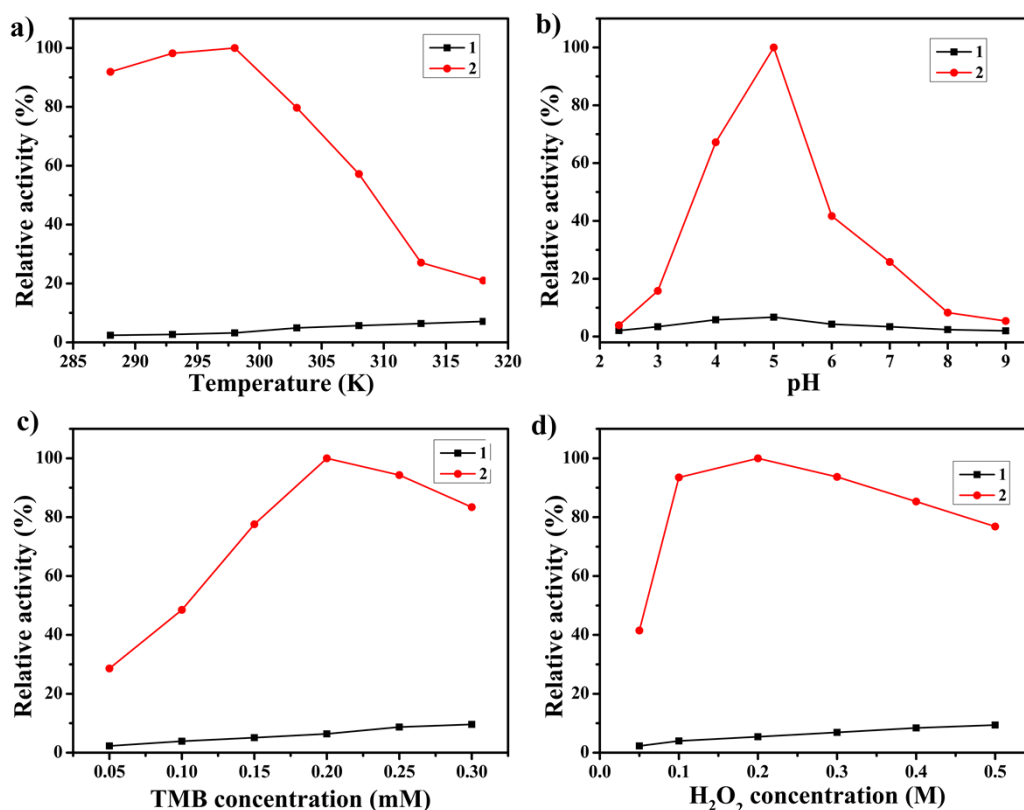

**Figure S4.** The mercury-stimulated peroxides-like catalytic activity of Au/Fe<sub>3</sub>O<sub>4</sub>/GO hybrid is dependent on temperature (a), pH (b), TMB concentration (c) and H<sub>2</sub>O<sub>2</sub> concentration (d) in the absence (1) and presence (2) of Hg<sup>2+</sup>. Experiments were carried out using 0.20 mM TMB, 0.20 M H<sub>2</sub>O<sub>2</sub>, 5  $\mu$ M Hg<sup>2+</sup> with the same amounts of the Au/Fe<sub>3</sub>O<sub>4</sub>/GO hybrid (5 nM Au NPs) in citric acid–disodium hydrogen phosphate buffer (25 mM pH 5.0).

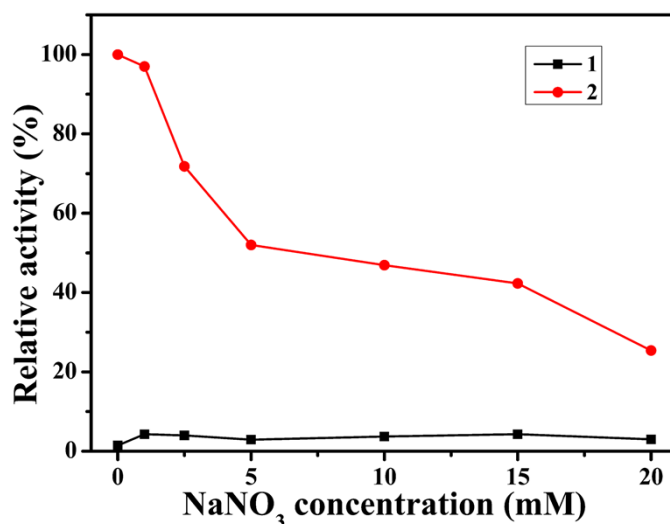

**Figure S5.** The mercury-stimulated peroxidase-like activities of the Au/Fe<sub>3</sub>O<sub>4</sub>/GO hybrid in the presence of NaNO<sub>3</sub> at various concentrations in the absence (1) and presence (2) of Hg<sup>2+</sup>. Experiments were carried out using 0.20 mM TMB, 0.20 M H<sub>2</sub>O<sub>2</sub> in citric acid–disodium hydrogen phosphate buffer (25 mM pH 5.0).

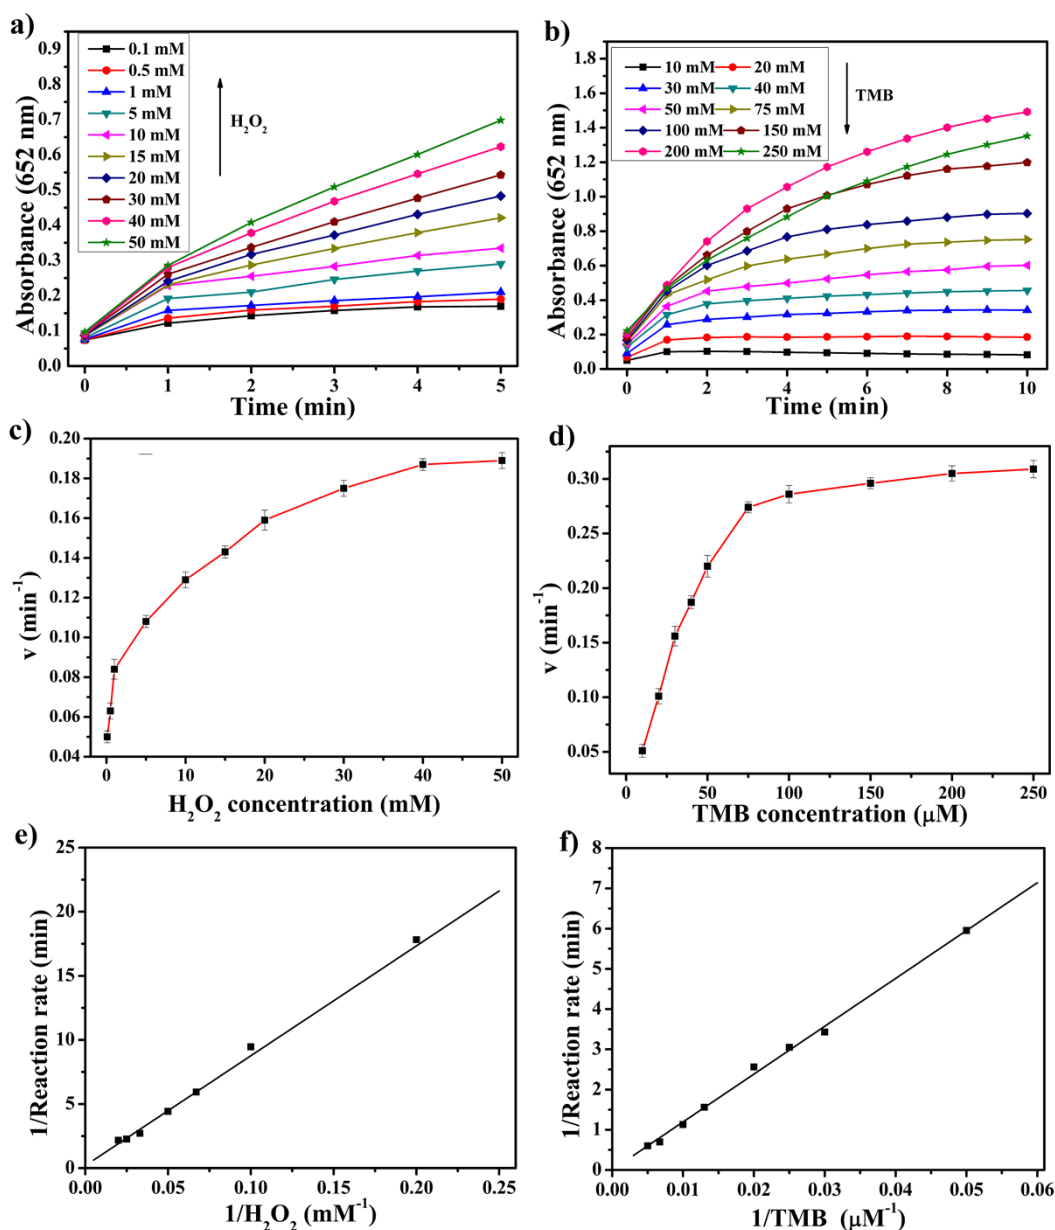

**Figure S6.** (a, b) Time-dependent absorbance changes at 652 nm of TMB reaction solutions catalyzed by the Au/Fe<sub>3</sub>O<sub>4</sub>/GO hybrid in the presence of different concentrations of H<sub>2</sub>O<sub>2</sub> and TMB. (c, d) Steady state kinetic assays of Au/Fe<sub>3</sub>O<sub>4</sub>/GO hybrid. Experiments were carried out in citric acid–disodium hydrogen phosphate buffer (25 mM pH 5.0) using Au/Fe<sub>3</sub>O<sub>4</sub>/GO hybrid (0.5 nM Au NPs) at room temperature. (c) TMB concentration was fixed at 0.20 mM for the Au/Fe<sub>3</sub>O<sub>4</sub>/GO hybrid, and the H<sub>2</sub>O<sub>2</sub> concentration was varied. (d) H<sub>2</sub>O<sub>2</sub> concentration was fixed at 0.20 M for the Au/Fe<sub>3</sub>O<sub>4</sub>/GO hybrid, and the TMB concentration was varied. Error bars shown represent the standard error derived from three repeated measurements. (e, f) The corresponding double reciprocal (Lineweaver-Burk) plots of the mercury-stimulated peroxides-like catalytic activity of the Au/Fe<sub>3</sub>O<sub>4</sub>/GO hybrid.

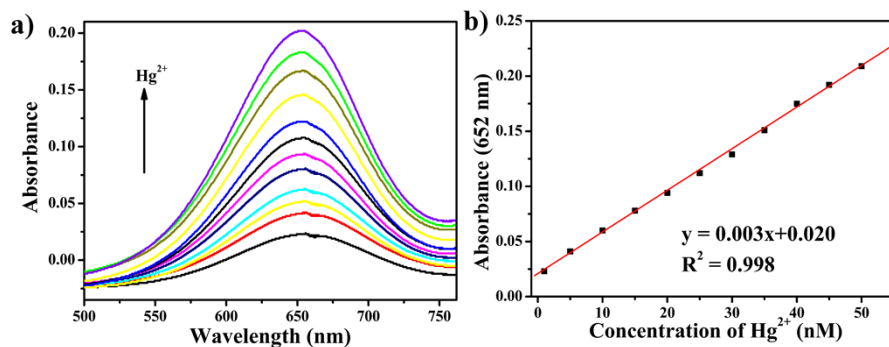

**Figure S7.** (a) The changes of absorption spectra after the addition of Hg<sup>2+</sup> from 1-50 nM. Experiments were carried out using Au/Fe<sub>3</sub>O<sub>4</sub>/GO hybrid (5 nM Au NPs), 0.20 mM TMB, 0.20 M H<sub>2</sub>O<sub>2</sub> in citric acid–disodium hydrogen phosphate buffer (25 mM pH 5.0). (b) The standard curve at low concentration of Hg<sup>2+</sup>.

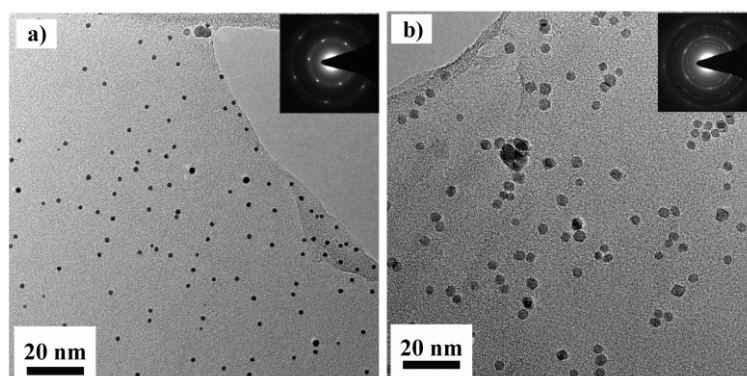

**Figure S8.** TEM images of Au/GO (a) and Fe<sub>3</sub>O<sub>4</sub>/GO (b), inset: the selected area electron diffraction of Au/GO and Fe<sub>3</sub>O<sub>4</sub>/GO.

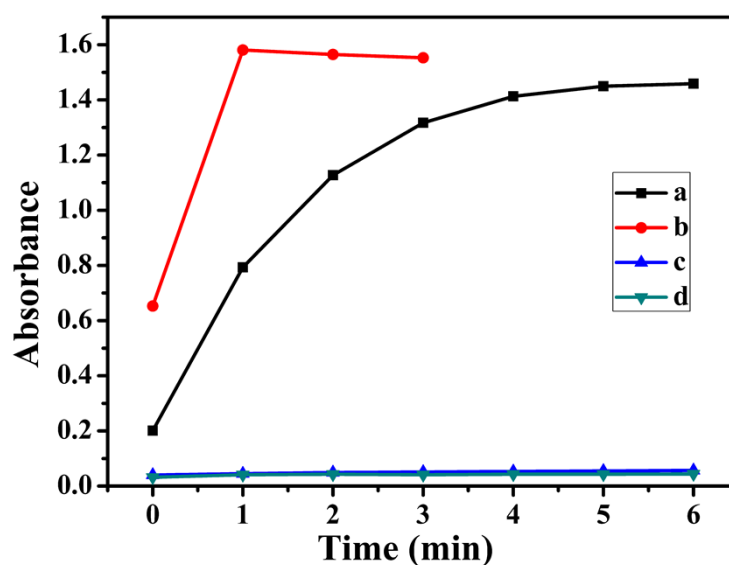

**Figure S9.** Enhancing effects of Hg<sup>2+</sup>-stimulated peroxidase mimic catalytic activity on the citrate-capped Au/Fe<sub>3</sub>O<sub>4</sub>/GO in the absence (a) and presence (b) of sodium borohydride (NaBH<sub>4</sub>). Effects

of  $\text{Hg}^{2+}$ -stimulated peroxidase mimic catalytic activity without Au/ $\text{Fe}_3\text{O}_4$ /GO in the absence (c) and presence (d) of sodium borohydride ( $\text{NaBH}_4$ ). All the samples were tested in citric acid–disodium hydrogen phosphate buffer. Au NPs, 5.0 nM;  $\text{Fe}_3\text{O}_4$  NPs, 20  $\mu\text{M}$ ;  $\text{Hg}^{2+}$ , 5.0  $\mu\text{M}$ ; TMB, 0.20 mM;  $\text{H}_2\text{O}_2$ , 0.20 M.

**Table S1.** The kinetic parameters of mercury-stimulated peroxidase mimetic catalytic activity of the Au/Fe<sub>3</sub>O<sub>4</sub>/GO hybrid in citric acid–disodium hydrogen phosphate buffer (25 mM, pH 5.0).  $K_m$  is the Michaelis constant,  $V_{max}$  is the maximal reaction velocity.

| Sample                                | Substance                     | $K_m$ (mM) | $V_{max}$ (nM s <sup>-1</sup> ) |
|---------------------------------------|-------------------------------|------------|---------------------------------|
| Au/Fe <sub>3</sub> O <sub>4</sub> /GO | TMB                           | 0.102      | 3367.8                          |
| Au/Fe <sub>3</sub> O <sub>4</sub> /GO | H <sub>2</sub> O <sub>2</sub> | 113        | 7936.5                          |

Table S2. Determination of Hg<sup>2+</sup> in real water samples.

| Samples      | Spiked Hg <sup>2+</sup> (nM) | Absorbance at 652 nm | Proposed Method (nM) | By AAS ( nM)  |
|--------------|------------------------------|----------------------|----------------------|---------------|
| Yellow river | 0                            | 0.015                | < 10                 | < 1           |
| 1            | 10                           | 0.072                | 11 ± 0.5             | 10.37 ± 0.062 |
| 2            | 20                           | 0.114                | 21 ± 0.5             | 20.52± 0.087  |
